# Supplementary material for: Public Perception on Healthcare Services: Evidence from Social Media Platforms in China
Source: PubMed Central journal article supplement (PMC6479867; doi:10.3390/ijerph16071273), 2019-04-10
Supplement: ijerph-16-01273-s001.pdf [file ijerph-16-01273-s001.pdf]

**Table S1: List of keywords, terms and text strings used for data searching.**

This study focuses on a list of 9 healthcare service topics. Each of these topics is represented by a service lexicon composed of service keywords and terms. There are 9 lexica, comprising 53 service keywords and terms. The first column in this table holds lexica names, subsequent columns hold service keywords and terms.

A. Chinese vision

| 主题   | 关键词  | 检索策略                                                        |
|------|------|-------------------------------------------------------------|
| 就诊环境 | 环境   | 医院 AND (环境 OR 条件 OR 布局)                                     |
|      | 条件   | 医院 AND 门诊 AND (环境 OR 条件 OR 布局)                              |
|      | 布局   | 医院 AND 诊室 AND (环境 OR 条件 OR 布局)                              |
|      | 门诊   | 医院 AND 缴费窗口 AND (环境 OR 条件 OR 布局)                            |
|      | 诊室   | 医院 AND (诊断 OR 治疗) AND (环境 OR 条件 OR 布局)                      |
|      | 缴费窗口 |                                                             |
|      | 诊断   |                                                             |
|      | 治疗   |                                                             |
| 预约诊疗 | 预约   | 医院 AND 门诊 AND (预约 OR 挂号 OR 转诊 OR 分时预约)                      |
|      | 挂号   |                                                             |
|      | 转诊   |                                                             |
|      | 分时预约 |                                                             |
| 服务效率 | 等待时间 | 医院 AND 门诊 AND (等待 OR 就诊 OR 治疗 OR 检查 OR 取药 OR 缴费) AND 时间     |
|      | 就诊时间 |                                                             |
|      | 治疗时间 |                                                             |
|      | 检查时间 |                                                             |
|      | 取药时间 |                                                             |
|      | 缴费时间 |                                                             |
| 信息技术 | 微博   | 医院 AND (微博 OR 微信 OR 公众号 OR 服务号 OR 网站 OR 自助机) AND (信息 OR 服务) |
|      | 微信   |                                                             |
|      | 公众号  |                                                             |
|      | 服务号  |                                                             |
|      | 网站   |                                                             |
| 住院服务 | 住院   | 医院 AND (住院 OR 出院 OR 入院) AND 服务                              |
|      | 出院   | 医院 AND (探视 OR 陪护) AND 条件                                    |
|      | 入院   | 医院 AND 住院 AND (膳食 OR 饭 OR 餐)                                |
|      | 探视   |                                                             |
|      | 陪护   |                                                             |

|      |                                         |                                                                                 |
|------|-----------------------------------------|---------------------------------------------------------------------------------|
|      | 膳食<br>饭<br>餐                            |                                                                                 |
| 护理服务 | 护理质量<br>护理技术<br>护士态度                    | 医院 AND (护士 OR 护理) AND (质量 OR 技术 OR 态度)                                          |
| 患者安全 | 处方<br>检查<br>检验<br>手术<br>用药<br>安全        | 医院 AND 医生 AND 处方<br>医院 AND (检查 OR 检验 OR 手术 OR 用药) AND 安全<br>医院 AND 医疗 AND 安全    |
| 人文关怀 | 医德<br>隐私保护<br>患者隐私<br>人文关怀<br>社工<br>志愿者 | 医院 AND (医生 OR 护士) AND 医德<br>医院 AND (隐私保护 OR 患者隐私)<br>医院 AND (人文关怀 OR 社工 OR 志愿者) |
| 医患关系 | 医疗纠纷<br>患者维权<br>医疗调解<br>起诉<br>诉讼<br>投诉  | 医院 AND (医疗纠纷 OR 患者维权 OR 医疗调解 OR 起诉 OR 诉讼 OR 投诉)                                 |

B. English vision

| Topics                     | keywords and terms     | Text strings used for searching with Boolean operators                                                                                         |
|----------------------------|------------------------|------------------------------------------------------------------------------------------------------------------------------------------------|
| Service environment        | circumstances          | hospital AND (environment OR circumstances OR surroundings)                                                                                    |
|                            | environment            |                                                                                                                                                |
|                            | surroundings           | hospital AND outpatient service AND (environment OR circumstances OR surroundings)                                                             |
|                            | outpatient service     | hospital AND consulting room AND (environment OR circumstances OR surroundings)                                                                |
|                            | consulting room        |                                                                                                                                                |
|                            | cashier desk           | hospital AND cashier desk AND (environment OR circumstances OR surroundings)                                                                   |
|                            | diagnosis              | hospital AND (diagnosis OR treatment) AND (environment OR circumstances OR surroundings)                                                       |
| Appointment-driven service | treatment              |                                                                                                                                                |
|                            | appointment            | hospital AND outpatient service AND (appointment OR registration service OR referral OR timeshare appointment)                                 |
|                            | registration service   |                                                                                                                                                |
|                            | referral               |                                                                                                                                                |
| Service efficiency         | timeshare appointment  |                                                                                                                                                |
|                            | waiting time           | hospital AND outpatient AND (waiting OR consultation OR treatment OR examination OR take the medicine OR payment) AND time                     |
|                            | consultation length    |                                                                                                                                                |
|                            | treatment time         |                                                                                                                                                |
|                            | examination time       |                                                                                                                                                |
|                            | take the medicine time |                                                                                                                                                |
| Information technology     | payment time           |                                                                                                                                                |
|                            | Weibo                  | hospital AND (Weibo OR official accounts OR service accounts OR WeChat OR website OR Self-service machine OR App) AND (information OR service) |
|                            | WeChat                 |                                                                                                                                                |
|                            | service accounts       |                                                                                                                                                |
|                            | official accounts      |                                                                                                                                                |
| Inpatient service          | website                |                                                                                                                                                |
|                            | Self-service machine   |                                                                                                                                                |
|                            | inpatient              | hospital AND (inpatient OR discharge OR admission) AND service                                                                                 |
|                            | discharge              | hospital AND patient visit AND condition                                                                                                       |
|                            | admission              | hospital AND inpatient AND (escort OR dietary OR food OR meal)                                                                                 |
|                            | patient visit          |                                                                                                                                                |
|                            | Escort                 |                                                                                                                                                |

|                             |                                                                                                                                    |                                                                                                                                                                                         |
|-----------------------------|------------------------------------------------------------------------------------------------------------------------------------|-----------------------------------------------------------------------------------------------------------------------------------------------------------------------------------------|
|                             | <p>dietary</p> <p>Food</p> <p>Meal</p>                                                                                             |                                                                                                                                                                                         |
| Nursing service             | <p>nursing quality</p> <p>nursing skill</p> <p>nurse attitude</p>                                                                  | <p>hospital AND (nurse OR nursing) AND (quality OR skill OR attitude)</p>                                                                                                               |
| Patient safety              | <p>prescription</p> <p>examination</p> <p>test</p> <p>operation</p> <p>medication</p> <p>safety</p>                                | <p>hospital AND doctor AND prescription</p> <p>hospital AND (examination OR test OR operation OR medication) AND safety</p> <p>hospital AND safety</p>                                  |
| Humanistic care             | <p>medical ethic</p> <p>privacy protection</p> <p>patient privacy</p> <p>humanistic care</p> <p>social worker</p> <p>volunteer</p> | <p>hospital AND (doctor OR nurse) AND medical ethic</p> <p>hospital AND (privacy protection OR patient privacy)</p> <p>hospital AND (humanistic care OR social worker OR volunteer)</p> |
| Doctor-patient relationship | <p>medical dispute</p> <p>patient right</p> <p>medical mediation</p> <p>lawsuit</p> <p>litigation</p> <p>complain</p>              | <p>hospital AND (medical dispute OR patient right OR medical mediation OR lawsuit OR litigation OR complain)</p>                                                                        |
